## Correction

**Correction: Bone marrow involvement identifies a subgroup of advanced Ewing sarcoma patients with fatal outcome irrespective of therapy in contrast to curable patients with multiple bone metastases but unaffected marrow****Uwe Thiel<sup>1</sup>, Angela Wawer<sup>1</sup>, Irene von Luettichau<sup>1</sup>, Hans-Ulrich Bender<sup>1</sup>, Franziska Blaeschke<sup>1</sup>, Thomas G.P. Grunewald<sup>2</sup>, Marc Steinborn<sup>3</sup>, Barbara Röper<sup>4,10,\*</sup>, Halvard Bonig<sup>5,6</sup>, Thomas Klingebiel<sup>5</sup>, Peter Bader<sup>5</sup>, Ewa Koscielniak<sup>7</sup>, Michael Paulussen<sup>8</sup>, Uta Dirksen<sup>9</sup>, Heribert Juergens<sup>9</sup>, Hans-Jochem Kolb<sup>1</sup> and Stefan E.G. Burdach<sup>1,10</sup>**

<sup>1</sup>Department of Pediatrics and Pediatric Oncology Center, Kinderklinik München Schwabing, Städtisches Klinikum München und Klinikum rechts der Isar, Wilhelm Sander Sarcoma Unit, Klinikum rechts der Isar, Technische Universität München, Munich, Germany

<sup>2</sup>Laboratory for Pediatric Sarcoma Biology, Institute of Pathology, LMU, Munich, Germany

<sup>3</sup>Department of Radiology, Klinikum Schwabing, Städtisches Klinikum München, Munich, Germany

<sup>4</sup>Department of Radiation Oncology, Klinikum rechts der Isar, Technische Universität München, Munich, Germany

<sup>5</sup>Department of Pediatric Hematology and Oncology, Universitätsklinikum Frankfurt, Frankfurt, Germany

<sup>6</sup>Department of Transfusion Medicine and Immunohematology, Universitätsklinikum Frankfurt, Frankfurt, Germany

<sup>7</sup>Department of Pediatric Oncology, Hematology and Immunology, Olgahospital, Klinikum Stuttgart, Stuttgart, Germany

<sup>8</sup>Vestische Kinder- und Jugendklinik, Datteln, Universität Witten/Herdecke, Datteln, Germany

<sup>9</sup>Department of Pediatric Hematology and Oncology, Universitätsklinikum Münster, Münster, Germany

<sup>10</sup>Munich Comprehensive Cancer Center, München, Germany

\* Present address: Radiation Oncology Clinic, Klinikum Bogenhausen, Städtisches Klinikum München, Munich, Germany

**Published:**

**Copyright:** © 2022 Thiel et al. This is an open access article distributed under the terms of the [Creative Commons Attribution License](https://creativecommons.org/licenses/by/3.0/) (CC BY 3.0), which permits unrestricted use, distribution, and reproduction in any medium, provided the original author and source are credited.

**This article has been corrected:** In the PATIENTS AND METHODS section, under the paragraph heading ‘Myeloablation and autologous stem cell transplantation,’ the text has been corrected as follows: ‘In MetaEICESS 2007 myeloablation consisted of melphalan (30 mg/m<sup>2</sup>/day on day -7 until -4 before first autologous stem cell transplantation) in combination with etoposide (1800 mg/m<sup>2</sup>/day on day -3 before first autologous stem cell transplantation) followed by application of topotecan (2 mg/m<sup>2</sup>/day on day -7 until -3 before second autologous stem cell transplantation) in combination with treosulfan (10 mg/m<sup>2</sup>/day on day -5 until -3 before second autologous stem cell transplantation).’ The authors declare that these corrections do not change the results or conclusions of this paper.

Original article: Oncotarget. 2016; 7:70959–70968. <https://doi.org/10.18632/oncotarget.10938>
